# Supplementary material
Source: Springer Nature journal article supplement (https://www.springermedizin.de/resource/supplementary/12998_2010_6_MOESM2_ESM.pdf/9680018)

## Institutional Recruitment

8 July – 25 August 2010

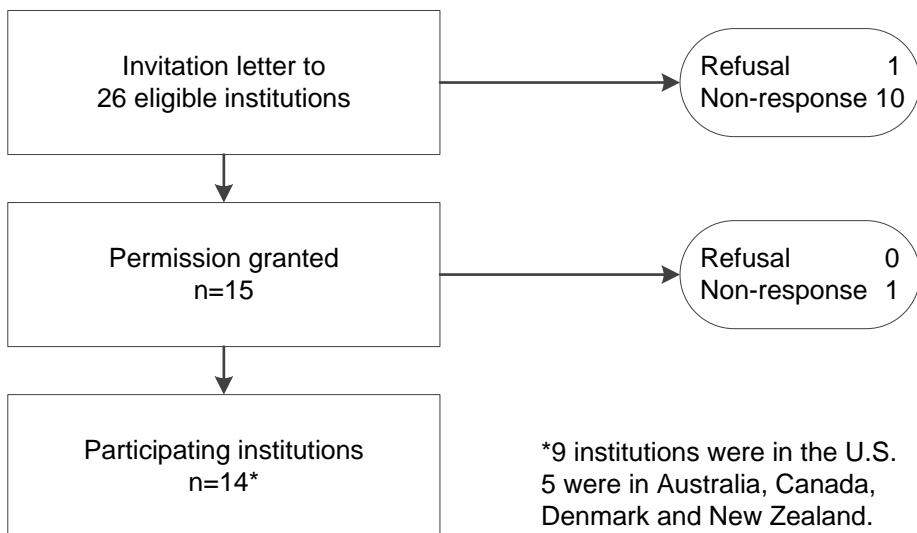

## Student Recruitment

8 July – 2 September 2010

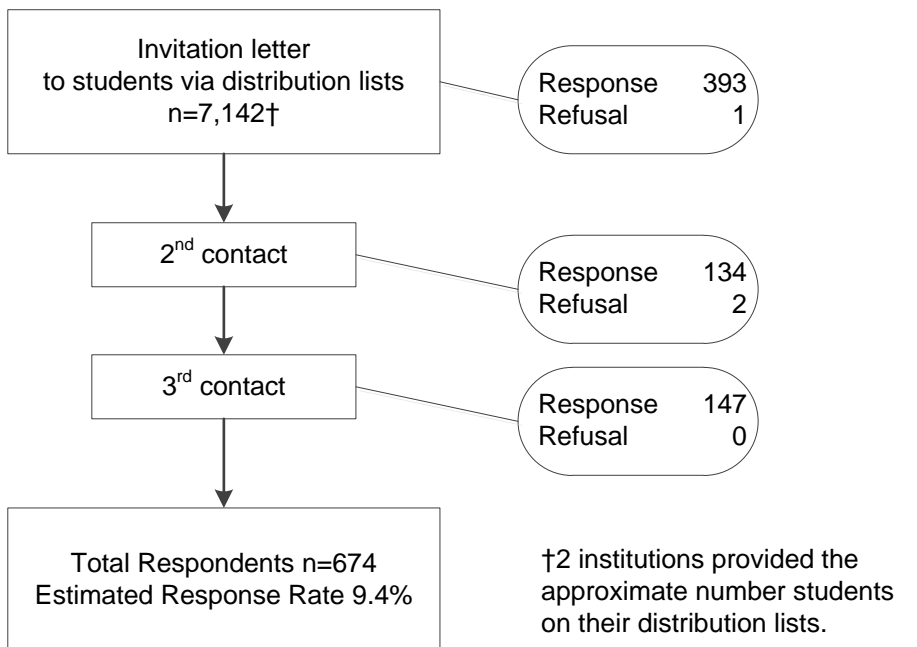

Supplement: MOESM2 [file 9680018]
